# Supplementary material
Source: PubMed Central journal article supplement (PMC9856900)
Supplement: jamasurg-e226387-s001.pdf [file jamasurg-e226387-s001.pdf]

## Supplemental Online Content

Lai JC, Shui AM, Duarte-Rojo A, et al. Association of frailty with health-related quality of life in liver transplant recipients. *JAMA Surg*. Published online December 14, 2022.  
doi:10.1001/jamasurg.2022.6387

**eTable 1.** Metrics to represent global functional health in this study of liver transplant recipients

**eTable 2.** Select demographics and survey-based scores of participants, categorized by those who underwent testing with performance-based metrics at 1 year post-transplant and those did not

This supplemental material has been provided by the authors to give readers additional information about their work.

**eTable 1. Metrics to represent global functional health in this study of liver transplant recipients.**

| Measure                                                      | Components                                                                                                                                                                | Range:<br>Not frail / fully functional → impaired | Comments about use                                                                                                                                                     |
|--------------------------------------------------------------|---------------------------------------------------------------------------------------------------------------------------------------------------------------------------|---------------------------------------------------|------------------------------------------------------------------------------------------------------------------------------------------------------------------------|
| <b>Survey-based instruments</b>                              |                                                                                                                                                                           |                                                   |                                                                                                                                                                        |
| <b>SF-36</b>                                                 | 36 items that are grouped into 8 sub-domains (6 physical and 2 mental)                                                                                                    | Continuous, higher values indicate better HRQL    | Sub-domains can be summarized using physical or mental component summary scores                                                                                        |
| <b>Activities of Daily Living</b>                            | 1) Bathing<br>2) Dressing<br>3) Toileting<br>4) Transferring<br>5) Continence<br>6) Feeding                                                                               | 6 → 0                                             | Assesses difficulty with performing activities necessary for daily functioning within one's home.                                                                      |
| <b>Instrumental Activities of Daily Living</b>               | 1) Using a telephone<br>2) Shopping<br>3) Food preparation<br>4) Housekeeping<br>5) Doing laundry<br>6) Transportation<br>7) Managing medications<br>8) Handling finances | 8 → 0                                             | Assesses difficulty with performing activities necessary for daily functioning within one's community.                                                                 |
| <b>Work status</b>                                           | "Are you currently working, retired, or on disability?"                                                                                                                   | --                                                | Participants were grouped as "not working" if they were on disability and/or were unemployed and looking for work.                                                     |
| <b>Instruments that include performance-based components</b> |                                                                                                                                                                           |                                                   |                                                                                                                                                                        |
| <b>Liver Frailty Index</b>                                   | 1) Grip strength<br>2) Timed chair stands<br>3) Balance testing                                                                                                           | Higher scores indicate higher degree of frailty   | LFI≥4.5 classified as "frail"                                                                                                                                          |
| <b>Fried Frailty Phenotype</b>                               | 4) Gait speed<br>5) Exhaustion<br>6) Physical activity<br>7) Unintentional weight loss<br>8) Weakness                                                                     | 0 → 5                                             | Originally developed to identify vulnerable older adults at risk for death. Has been shown to predict long-term institutionalization, and post-surgical complications. |
| <b>Short Physical Performance Battery</b>                    | 1) Repeated chair stands<br>2) Balance testing<br>9) 13 foot walk                                                                                                         | 12 → 0                                            | A measure of lower extremity strength. Identifies older adults at risk of physical disability.                                                                         |

**eTable 2. Select demographics and survey-based scores of participants, categorized by those who underwent testing with performance-based metrics at 1 year post-transplant and those did not.**

| Characteristics*                           |                               | With performance-based metrics<br>n=210 (59%) | Without performance-based metrics<br>n=148 (41%) | p-value |
|--------------------------------------------|-------------------------------|-----------------------------------------------|--------------------------------------------------|---------|
| <b>Demographics</b>                        |                               |                                               |                                                  |         |
| <b>Age, years</b>                          |                               | 59 (53-64)                                    | 61 (54-67)                                       | 0.03    |
| <b>Female, n (%)</b>                       |                               | 33%                                           | 31%                                              | 0.72    |
| <b>Race/<br/>Ethnicity</b>                 | <b>Non-Hispanic White</b>     | 69%                                           | 68%                                              | 0.47    |
|                                            | <b>Black</b>                  | 6%                                            | 5%                                               |         |
|                                            | <b>Hispanic White</b>         | 15%                                           | 16%                                              |         |
|                                            | <b>Asian/Pacific Islander</b> | 7%                                            | 6%                                               |         |
|                                            | <b>Other</b>                  | 2%                                            | 6%                                               |         |
| <b>Hepatocellular carcinoma</b>            |                               | 38%                                           | 32%                                              | 0.22    |
| <b>PCS</b>                                 |                               |                                               |                                                  |         |
|                                            |                               | 48 (37-54)                                    | 52 (37-56)                                       | 0.04    |
| <b>MCS</b>                                 |                               |                                               |                                                  |         |
|                                            |                               | 56 (48-60)                                    | 58 (53-61)                                       | 0.02    |
| <b>% ADL<math>\geq</math>1</b>             |                               | 6%                                            | 8%                                               | 0.37    |
| <b>% IADL<math>\geq</math>1</b>            |                               | 12%                                           | 12%                                              | 0.95    |
| <b>On disability / not working (other)</b> |                               | 27%                                           | 36%                                              | 0.06    |

\* Median (1<sup>st</sup> quartile-3<sup>rd</sup> quartile) or n (%); Mann-Whitney or chi-square tests
